# Supplementary material for: HIV-1 envelope glycoprotein stimulates viral transcription and increases the infectivity of the progeny virus through the manipulation of cellular machinery
Source: PubMed Central journal article supplement (PMC5573355; doi:10.1038/s41598-017-10272-7), 2017-08-25
Supplement: 41598_2017_10272_MOESM1_ESM.pdf [file 41598_2017_10272_MOESM1_ESM.pdf]

**HIV-1 envelope glycoprotein stimulates viral transcription and increases the infectivity of  
the progeny virus through the manipulation of cellular machinery**

Xiaozhuo Ran , Zhujun Ao , Adriana Trajtmán , Wayne Xu , Gary Kobinger , Yoav Keynan ,  
and Xiaojian Yao

Supplementary figure: Uncropped full-length pictures of western blotting membranes

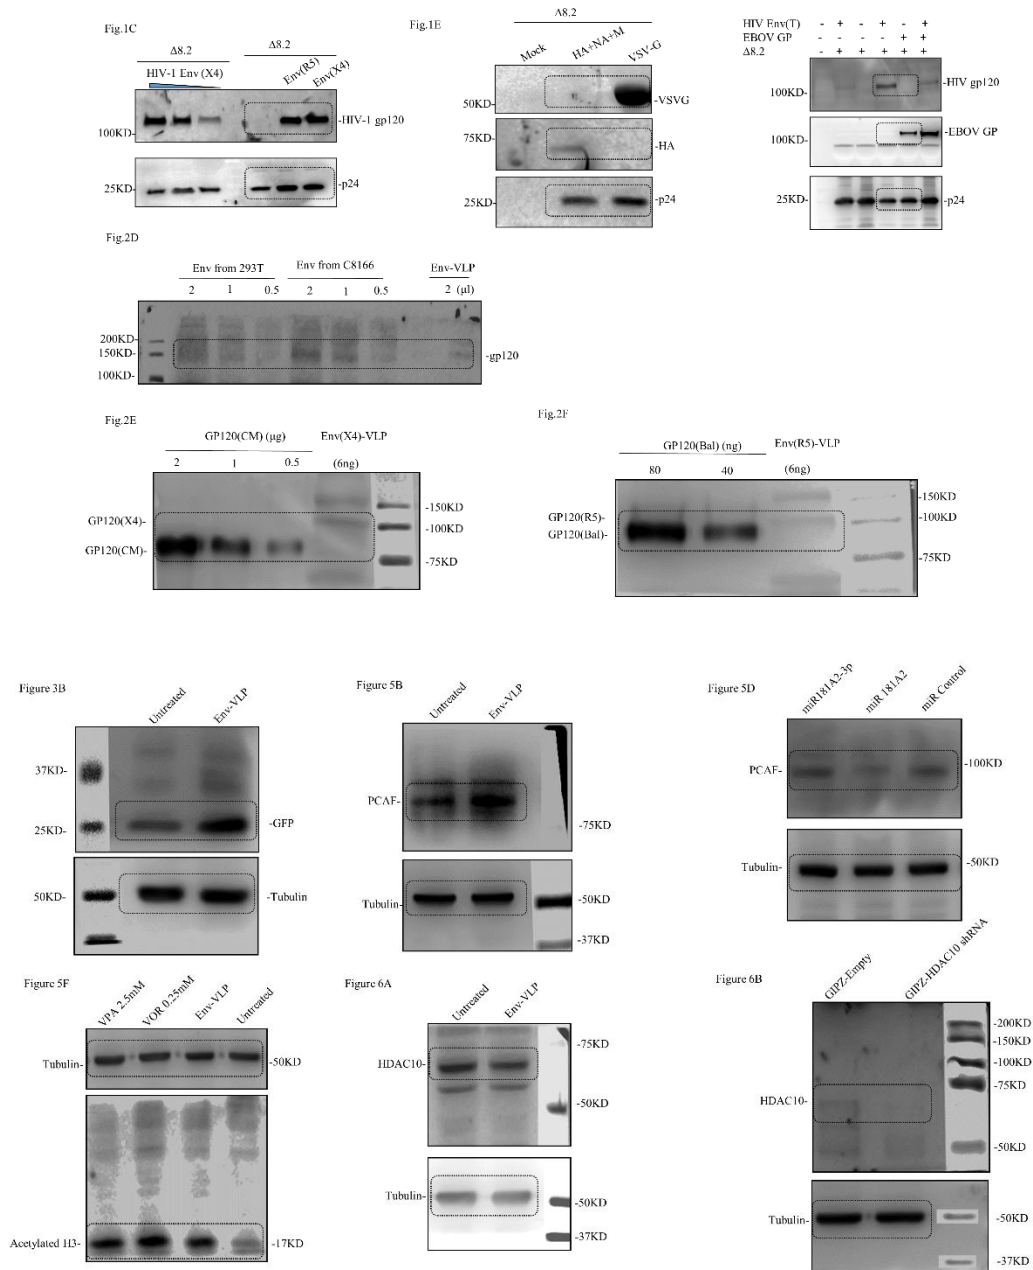

Uncropped full-length pictures of Western blotting membranes presented in the main figures. Membranes were often cut to enable blotting for multiple antibodies and to enable blotting for target proteins.
